# Supplementary material for: Highly efficient hydrogenation of nitroarenes by Co nanoparticles encapsulated in N-doped carbon nanotubes under mild conditions
Source: Royal Society of Chemistry journal article supplement (doi:10.1039/d3qi01847d), 2023-01-01
Supplement: d3qi01847d1.pdf [file d3qi01847d1.pdf]

## Electronic Supplementary Information

### Highly Efficient Hydrogenation of Nitroarenes by Co Nanoparticles Encapsulated in N-doped Carbon Nanotubes under Mild Conditions

Zan Zhang,<sup>a‡</sup> Yuan Liu,<sup>a‡</sup> Jinfeng Du,<sup>b</sup> Yisen Jiang,<sup>a</sup> Zhaoxu Wang,<sup>\*a</sup> Ruirui Yun<sup>\*c</sup>  
and Baishu Zheng<sup>\*a</sup>

*<sup>a</sup>Key Laboratory of Theoretical Organic Chemistry and Function Molecule of Ministry of Education, Hunan Provincial Key Laboratory of Controllable Preparation and Functional Application of Fine Polymers, Hunan Provincial Key Laboratory of Advanced Materials for New Energy Storage and Conversion, School of Chemistry and Chemical Engineering, Hunan University of Science and Technology, Xiangtan 411201, China. E-mail: zbaishu@163.com (B. S. Zheng), hnust\_chem@163.com (Z.W. Wang).*

*<sup>b</sup>Hainan Vocational University of Science and Technology, Haikou 571126, China.*

*<sup>c</sup>The Key Laboratory of Functional Molecular Solids Ministry of Education, College of Chemistry and Materials Science, Anhui Normal University, Wuhu 214001, P. R. China. E-mail: ruirui58@ahnu.edu.cn. (R. R. Yun).*

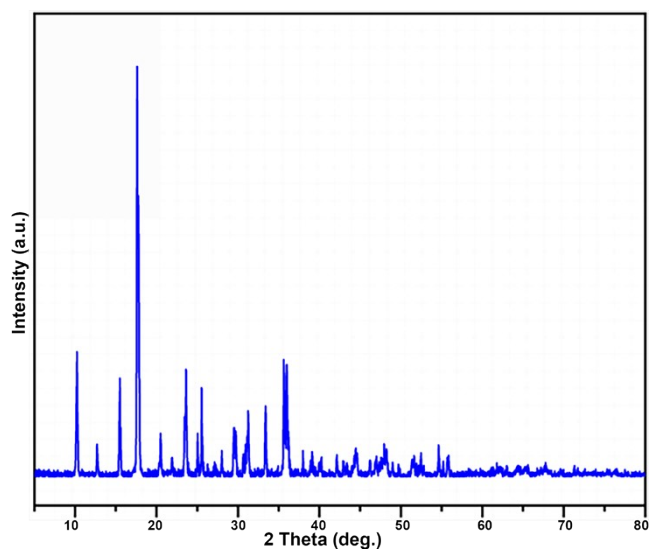

Figure S1. The PXRD of as-synthesized ahnu-11.

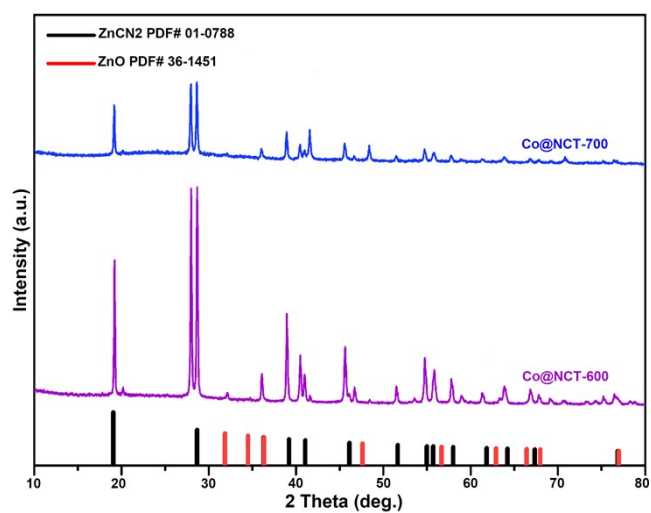

Figure S2. The PXRD of as-synthesized catalysts in a pyrolytic temperature range of 600-700°C.

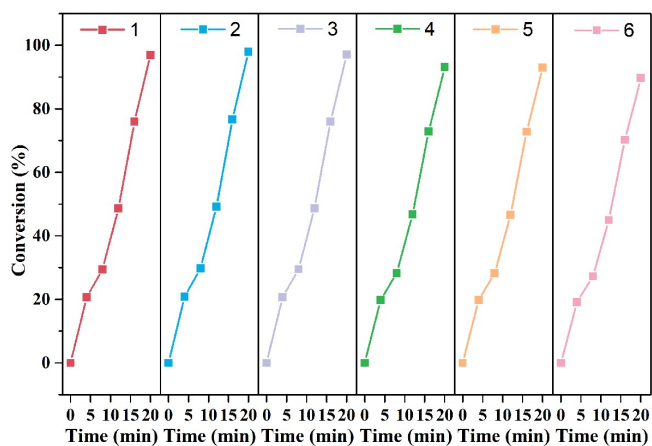

Figure S3. The catalytic performance of the cyclic hydrogenation of 4-nitrobenzene with Co@NCT-800 as catalyst.

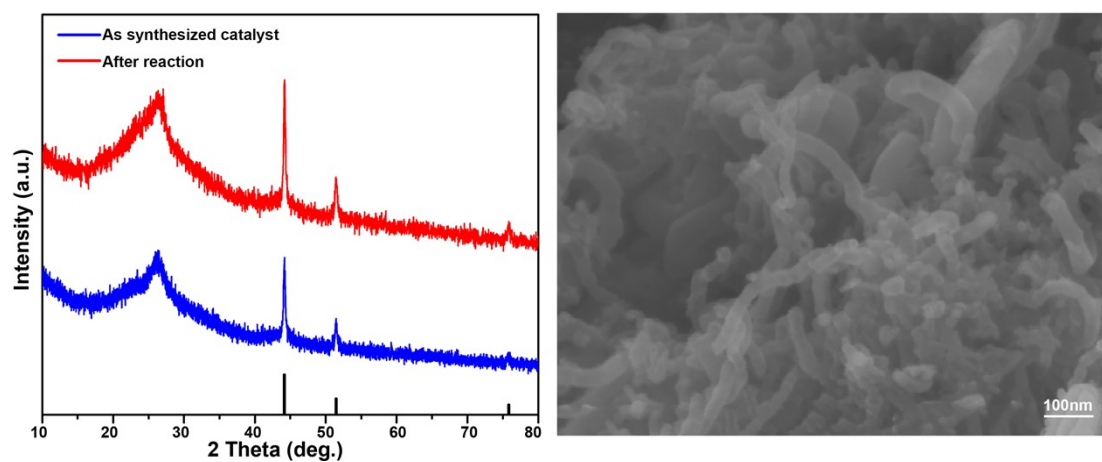

**Figure S4. (Left) the XRD of as-synthesized and recycled Co@NCT-800; (Right) the SEM image of Co@NCT-800 after catalytic reactions.**

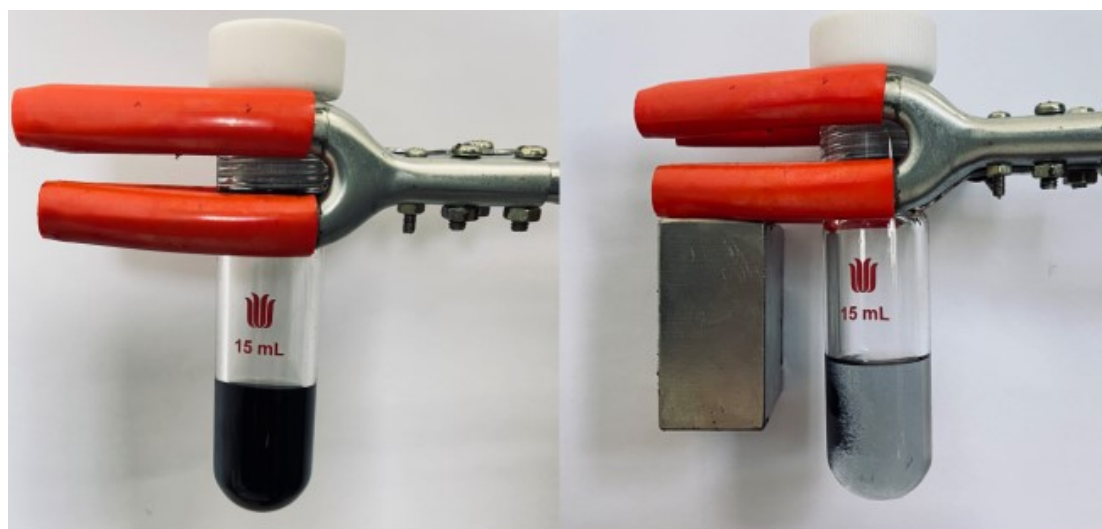

**Figure S5. The Co@NCT-800 catalyst is easy to recover owing to its inherent magnetism (left and right: without and with an external magnet for the catalytic reaction system).**

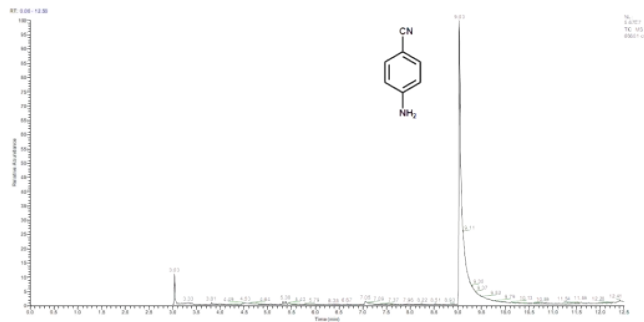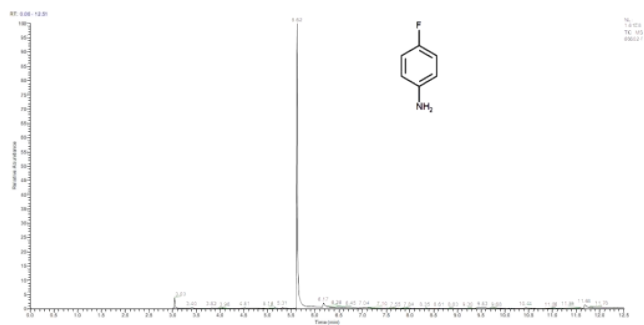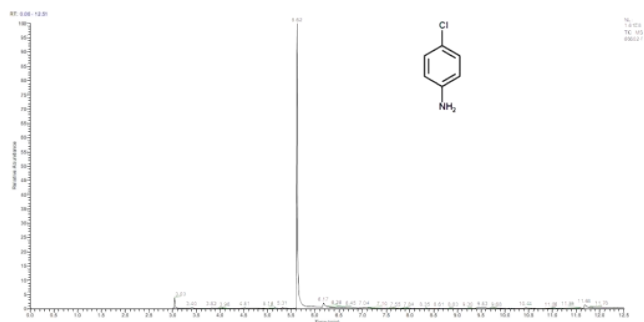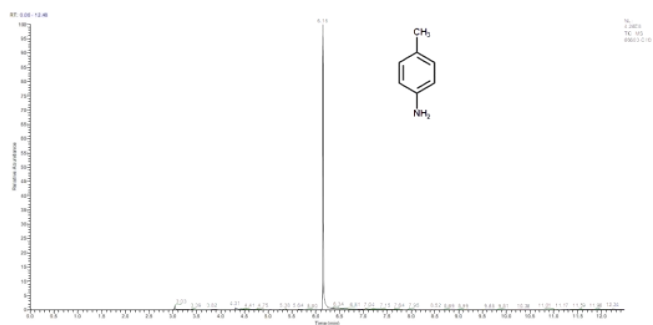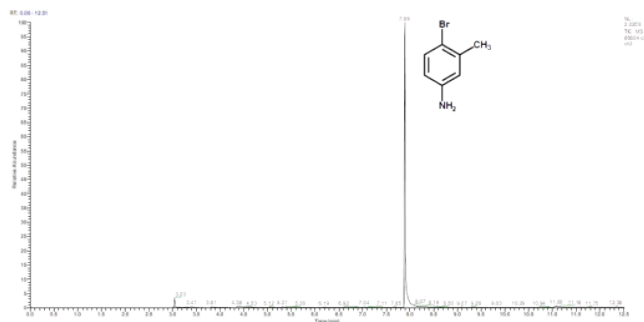

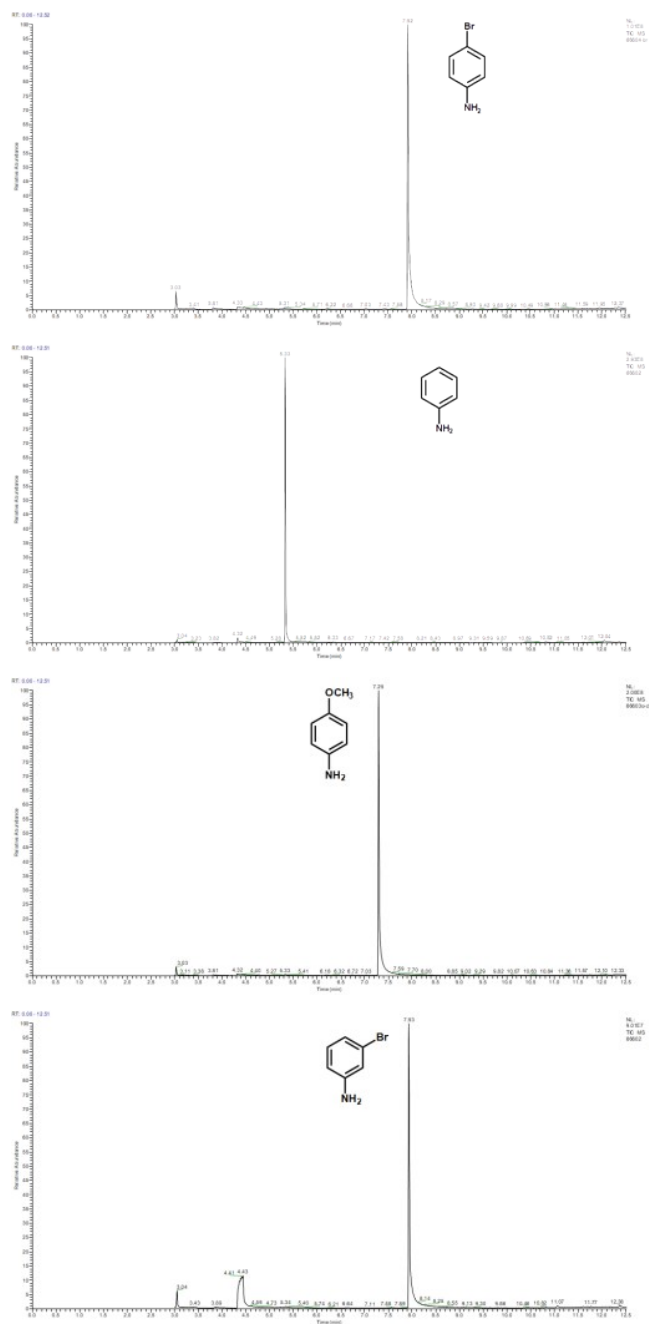

**Figure S6. The GC spectra of nitro compounds after hydrogenation.**

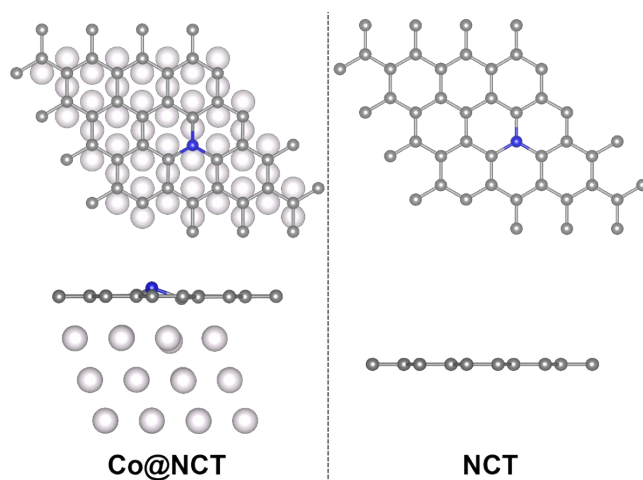

**Figure S7. Top and side views of the most stable geometries of Co@NCT and NCT.**

**Table S1.** Comparison of the catalytic activity of Co@NCT to recent reported Co-based catalysts in the hydrogenation of nitrobenzene to aniline.

| Entry | Catalysts         | T/°C | P/MPa | S/% | C/% | Reference |
|-------|-------------------|------|-------|-----|-----|-----------|
| 1     | Co@NCT-800        | 40   | 0.1   | >99 | >99 | This      |
| 2     | Co SAs/NC         | 110  | 3     | >99 | 59  | [20]      |
| 3     | Co@NMC-800        | 80   | 1     | >99 | >99 | [42]      |
| 4     | Co@N-doped carbon | 110  | 5     | >99 | >99 | [43]      |

**Table S2.** ICP-AES element analysis results for the materials.

| Sample     | The content of Zn (%) | The content of Co (%) |
|------------|-----------------------|-----------------------|
| Co@NCT-600 | 17.1                  | 7.2                   |
| Co@NCT-700 | 10.2                  | 9.7                   |
| Co@NCT-800 | 0                     | 14.7                  |
| Co@NCT-900 | 0                     | 15.6                  |

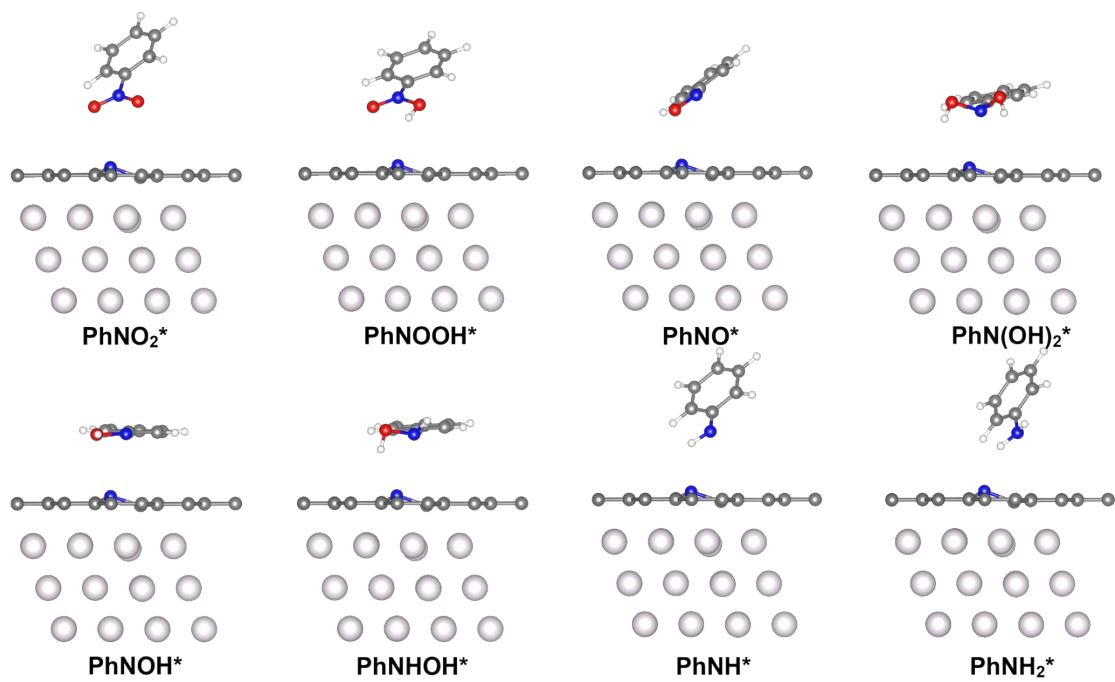

**Figure S8. The optimized configuration of catalyst and reaction intermediates.**

POSCAR for Co@NCT

Co C N

|                     |                    |                     |
|---------------------|--------------------|---------------------|
| 10.0239000320000002 | 0.0000000000000000 | 0.0000000000000000  |
| -5.0119500160000001 | 8.6809520727000002 | 0.0000000000000000  |
| 0.0000000000000000  | 0.0000000000000000 | 28.2686004639000004 |

Co C N

48 31 1

Selective Dynamics

Cartesian

|                     |                    |                    |       |
|---------------------|--------------------|--------------------|-------|
| 3.0495209671873997  | 1.9732672330073413 | 1.2500375407822586 | F F F |
| 0.5497106627190300  | 3.4225520686922293 | 3.1691926849334271 | T T T |
| 0.5161807070880899  | 0.5254580202795790 | 5.1414929675683307 | T T T |
| 1.7965334631873997  | 4.1435052511823409 | 1.2500375407822586 | F F F |
| 1.7904691239548400  | 1.2611687518456642 | 3.1570373280769526 | T T T |
| -0.6990167238629700 | 2.7172248690424916 | 5.1154859399473445 | T T T |
| -0.7094415448126001 | 4.1435052511823409 | 1.2500375407822586 | F F F |
| -0.7059832491820599 | 1.2549183795437995 | 3.1700408560217461 | T T T |
| 1.8057052415015797  | 2.7490840239159651 | 5.1406450226288163 | T T T |
| 0.5435459591873999  | 1.9732672330073413 | 1.2500375407822586 | F F F |
| -1.9593215545995297 | 3.4295836225092122 | 3.1641043933871260 | T T T |
| 3.0366903550986399  | 0.5601818372513311 | 5.1024824120025505 | T T T |
| 8.0614709831873981  | 1.9732672330073413 | 1.2500375407822586 | F F F |
| 5.5565986041909206  | 3.4085759007932714 | 3.1643870228545641 | T T T |
| 5.5661214345200705  | 0.5567094651032032 | 5.0988075504794441 | T T T |
| 6.8084834791873989  | 4.1435052511823409 | 1.2500375407822586 | F F F |



|                     |                    |                    |   |   |   |
|---------------------|--------------------|--------------------|---|---|---|
| 6.8156003329352703  | 1.2551789035964533 | 3.1550585825816806 | T | T | T |
| 4.2874226219260398  | 2.7395349419121868 | 5.1293373845630521 | T | T | T |
| 4.3025084711873998  | 4.1435052511823409 | 1.2500375407822586 | F | F | F |
| 4.2999524067509407  | 1.2545711935466042 | 3.1542104114933616 | T | T | T |
| 6.8146982270399388  | 2.7168776743643441 | 5.1075709296976557 | T | T | T |
| 5.5554959751873998  | 1.9732672330073413 | 1.2500375407822586 | F | F | F |
| 3.0464133677233800  | 3.4155205235561987 | 3.1658004811463596 | T | T | T |
| 8.0969056251709706  | 0.5290172279912901 | 5.1344259022581573 | T | T | T |
| 0.5435459591874001  | 6.3137432693573405 | 1.2500375407822586 | F | F | F |
| -1.9933027711740605 | 7.7818660054256945 | 3.1355530786499868 | T | T | T |
| -1.9387225252369200 | 4.9177594186321665 | 5.1446025418879602 | T | T | T |
| -0.7094415448126004 | 8.4839812875323410 | 1.2500375407822586 | F | F | F |
| -0.7113462812847309 | 5.5975648882976801 | 3.1725851148692983 | T | T | T |
| -3.2172207646032600 | 7.0547492514734929 | 5.1276414946840214 | T | T | T |
| -3.2154165528126004 | 8.4839812875323410 | 1.2500375407822586 | F | F | F |
| -3.1992278991294700 | 5.5886232645961416 | 3.1703235137577845 | T | T | T |
| -0.7105940727904798 | 7.1529306631585925 | 4.9925173300491759 | T | T | T |
| -1.9624290488125997 | 6.3137432693573405 | 1.2500375407822586 | F | F | F |
| -4.4564255363699612 | 7.7791748755593488 | 3.1542104114933616 | T | T | T |
| 0.5449494154547803  | 4.9150682887658208 | 5.1505390045225798 | T | T | T |
| 5.5554959751873998  | 6.3137432693573405 | 1.2500375407822586 | F | F | F |
| 3.0435567115847100  | 7.7816052209444786 | 3.1530796109376049 | T | T | T |
| 3.0345351965439598  | 4.9620323783743618 | 4.9851676352715639 | T | T | T |
| 4.3025084711873989  | 8.4839812875323410 | 1.2500375407822586 | F | F | F |
| 4.3307757239310893  | 5.5696120316426416 | 3.1038924157420213 | T | T | T |

|                     |                    |                    |       |
|---------------------|--------------------|--------------------|-------|
| 1.7987387211944403  | 7.0634300993747683 | 5.1143553372717898 | T T T |
| 1.7965334631873997  | 8.4839812875323410 | 1.2500375407822586 | F F F |
| 1.7584425879343497  | 5.6081555456549497 | 3.1378146797615005 | T T T |
| 4.3095750550766105  | 6.9565678484693452 | 4.9874292363830781 | T T T |
| 3.0495209671874002  | 6.3137432693573405 | 1.2500375407822586 | F F F |
| 0.5684554159222701  | 7.7847304678620759 | 3.1301821293676468 | T T T |
| 5.5472260772308006  | 4.8641112389943055 | 5.1106804757486843 | T T T |
| -4.5042895838435104 | 8.4805088459365958 | 7.1135103945869922 | T T T |
| -1.9615268727499697 | 8.4688766132258362 | 7.0467968932525951 | T T T |
| 3.0562368398742397  | 1.2268789911584994 | 7.0665848287715241 | T T T |
| 0.5510639343308998  | 8.4680083704423819 | 7.0295527925522121 | T T T |
| 5.5517368322451990  | 1.2358203544314763 | 7.0493407280711402 | T T T |
| 3.0904187549752109  | 8.4789462224777985 | 7.1115314229429174 | T T T |
| 8.0740509626917110  | 1.2351258348608998 | 7.0841115589393446 | T T T |
| -0.7042290566525600 | 1.9873303232794028 | 7.0883517076659270 | T T T |
| -0.6958590951138899 | 3.4136976364733087 | 7.0891992285764358 | T T T |
| 1.8092639264909405  | 1.9848997261466632 | 7.0733692363456591 | T T T |
| 1.8378318511280398  | 3.4318408870719161 | 7.1058784661023493 | T T T |
| 4.2943388022072195  | 1.9879380420102042 | 7.0688460058540308 | T T T |
| 4.2653197870328299  | 3.4283684454761714 | 7.1030511254897508 | T T T |
| 6.8024188442497886  | 3.4230731167975370 | 7.0564081891417203 | T T T |
| -1.9485459873638802 | 4.1654681293738891 | 7.0810020128883151 | T T T |
| -1.9205793413582506 | 5.5986933947052275 | 7.1222737738052038 | T T T |
| 0.5594839452024298  | 4.1646868176444896 | 7.1024858382862748 | T T T |
| 0.5124215942175900  | 5.5955681477876302 | 7.1242527171806787 | T T T |

|                     |                    |                    |       |
|---------------------|--------------------|--------------------|-------|
| 3.0473154034514081  | 5.5475624828256000 | 6.9455951905174311 | T T T |
| 5.5305367698366705  | 4.1679854058130736 | 7.0728039208735813 | T T T |
| 5.5564985305849497  | 5.6043359093810574 | 7.0524502741221697 | T T T |
| -3.1949678468668203 | 6.3248549748199174 | 7.0942877462715410 | T T T |
| -3.2349129331238902 | 7.7500065901236592 | 7.0906129130170337 | T T T |
| -0.7045799232253800 | 7.6913233454312540 | 6.9727328208139712 | T T T |
| 1.7883642402707705  | 6.3060170744364532 | 7.0646058571274475 | T T T |
| 1.8276076284658505  | 7.7398500498176412 | 7.0744998107526120 | T T T |
| 4.2986992889362394  | 6.3637456748294223 | 6.9402240150862875 | T T T |
| 0.5403383562847102  | 1.2399003758627891 | 7.0852421616148984 | T T T |
| 6.8106885166686402  | 1.9783021678476032 | 7.0549945329697215 | T T T |
| -0.7018234860392307 | 6.3069722395930121 | 7.4728044478261637 | T T T |
| 4.2989502322615918  | 7.7642435425038316 | 7.4516028561352368 | T T T |
| 3.0562372859377915  | 4.1459358569960330 | 7.4496238844911602 | T T T |

POSCAR for NCT

C N

|               |              |               |
|---------------|--------------|---------------|
| 10.0239000320 | 0.0000000000 | 0.0000000000  |
| -5.0119500160 | 8.6809520727 | 0.0000000000  |
| 0.0000000000  | 0.0000000000 | 28.2686004639 |

C N

31 1

Direct

|             |             |             |
|-------------|-------------|-------------|
| 0.043290000 | 0.978879988 | 0.250569999 |
| 0.293579996 | 0.979070008 | 0.251170009 |
| 0.375950009 | 0.143710002 | 0.251480013 |
| 0.543749988 | 0.979040027 | 0.250530005 |
| 0.626060009 | 0.144820005 | 0.250809997 |
| 0.793380022 | 0.978630006 | 0.250369996 |
| 0.876020014 | 0.143930003 | 0.250759989 |
| 0.043910000 | 0.229330003 | 0.250979990 |
| 0.127120003 | 0.394180000 | 0.251040012 |
| 0.295419991 | 0.230250001 | 0.251560003 |
| 0.380760014 | 0.395370007 | 0.252590001 |
| 0.543049991 | 0.230419993 | 0.251540005 |
| 0.622799993 | 0.395429999 | 0.252620012 |
| 0.875050008 | 0.394239992 | 0.251040012 |
| 0.043669999 | 0.479350001 | 0.250950009 |
| 0.126090005 | 0.644140005 | 0.251080006 |
| 0.295989990 | 0.479250014 | 0.251509994 |

|             |             |             |
|-------------|-------------|-------------|
| 0.376199991 | 0.643729985 | 0.251139998 |
| 0.622730017 | 0.637279987 | 0.247649997 |
| 0.791310012 | 0.479290009 | 0.251509994 |
| 0.875559986 | 0.643639982 | 0.251109987 |
| 0.043219998 | 0.728919983 | 0.251040012 |
| 0.125860006 | 0.893859982 | 0.250930011 |
| 0.376139998 | 0.893970013 | 0.250919998 |
| 0.543250024 | 0.726520002 | 0.249819994 |
| 0.626020014 | 0.892679989 | 0.250209987 |
| 0.791390002 | 0.726429999 | 0.249850005 |
| 0.126760006 | 0.144669995 | 0.250829995 |
| 0.793529987 | 0.229389995 | 0.250970006 |
| 0.293769985 | 0.729009986 | 0.251020014 |
| 0.874670029 | 0.892509997 | 0.250239998 |
| 0.542729974 | 0.477369994 | 0.264230013 |
